# Supplementary material for: Synthesis of fluorescent boron carbon nitride nanosheets for the detection of Cu2+ ions and epinephrine
Source: Royal Society of Chemistry journal article supplement (doi:10.1039/d3nj00704a), 2023-01-01
Supplement: d3nj00704a1.pdf [file d3nj00704a1.pdf]

## Synthesis of fluorescent boron carbon nitride nanosheets for the detection of $\text{Cu}^{2+}$ ion and epinephrine

Mayurkumar Revabhai Patel<sup>a</sup>, Tae Jung Park<sup>b</sup> and Suresh Kumar Kailasa<sup>a\*</sup>

<sup>a</sup>Department of Chemistry, Sardar Vallabhbhai National Institute of Technology, Surat-395 007, Gujarat, India

<sup>b</sup>Department of Chemistry, Research Institute of Chem-Bio Diagnostic Technology, Chung-Ang University, 84 Heukseok-ro, Dongjak-gu, Seoul 06974, Republic of Korea

\* Corresponding author, Phone: +91-261-2201730; Fax: +91-261-2227334

E-mail: sureshkumarchem@gmail.com; skk@chem.svnit.ac.in (S. K. Kailasa)

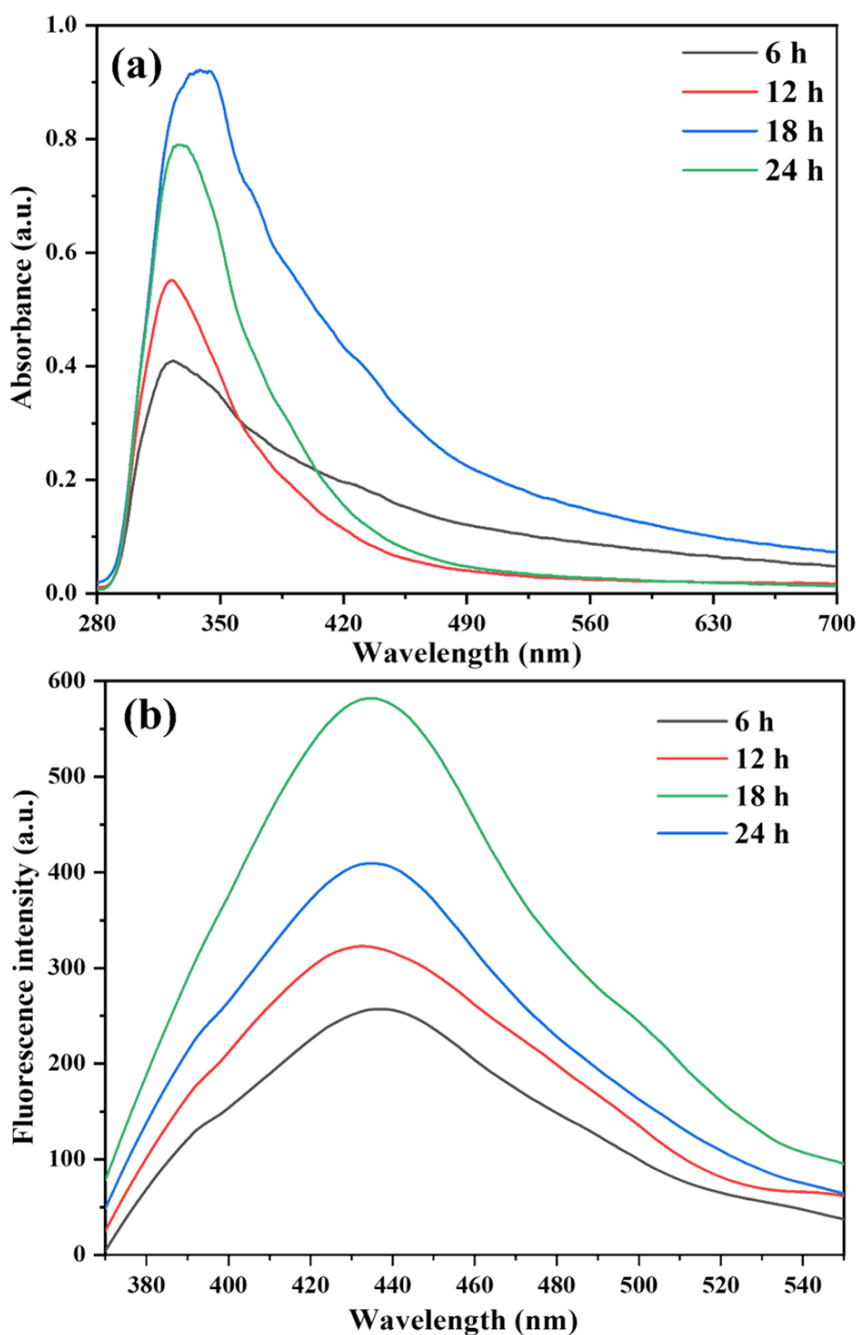

**Figure S1.** (a) Absorbance and (b) fluorescence emission spectra of BCNNSs at different reaction times from 6, 12, 18, and 24 h.

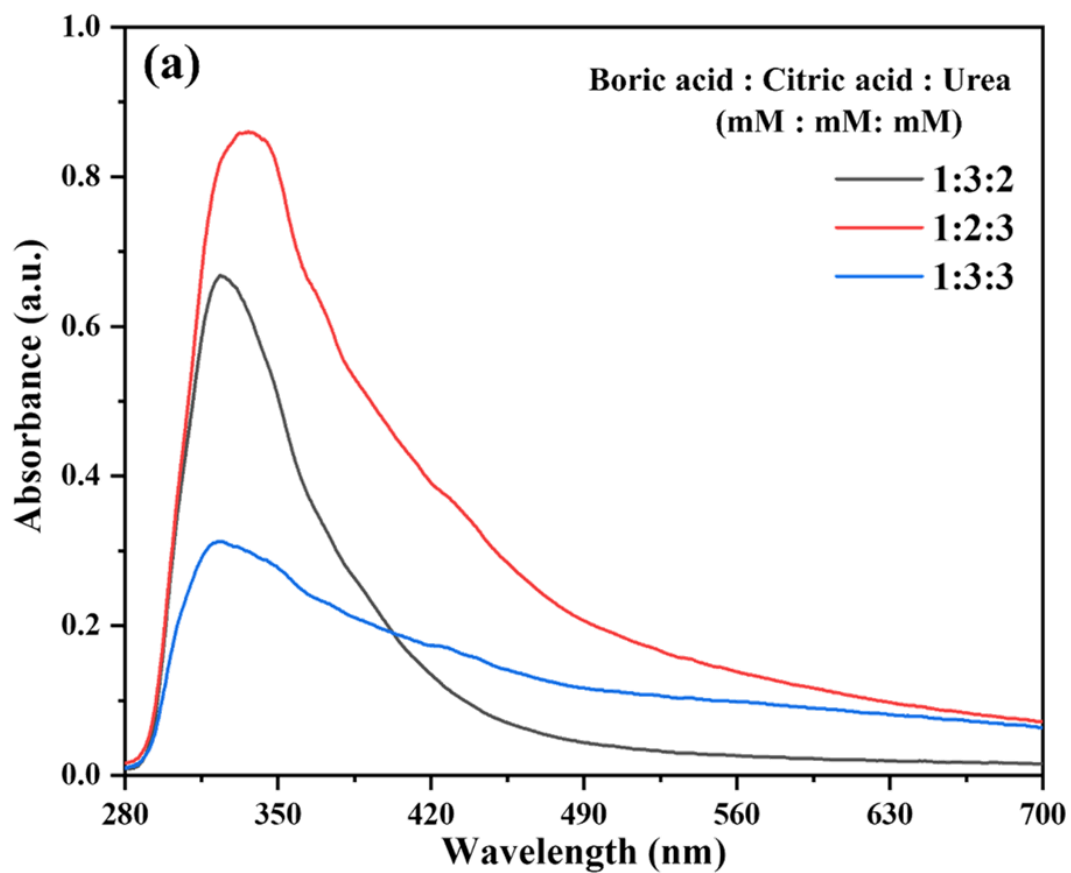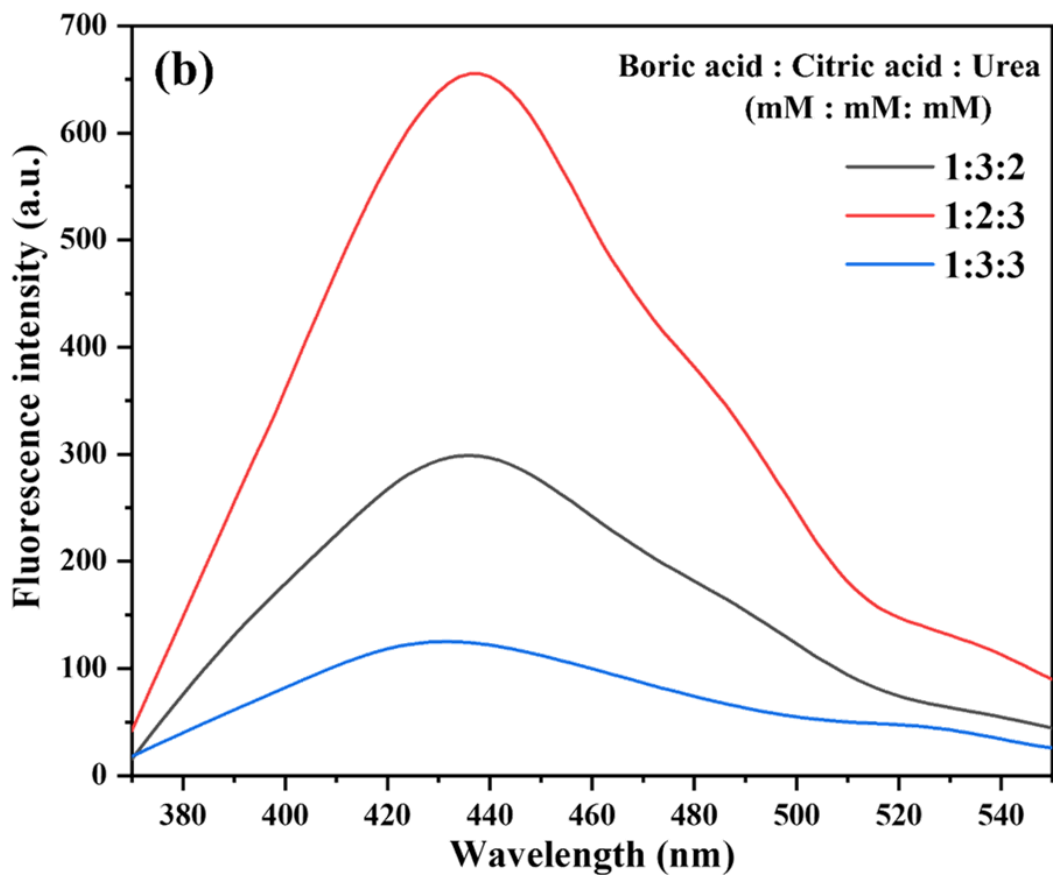

**Figure S2.** (a) Absorbance and (b) fluorescence emission spectra of BCNNSs at different molar ratios of boric acid: citric acid: urea (1:3:2, 1:2:3, and 1:3:3, mM:mM:mM).

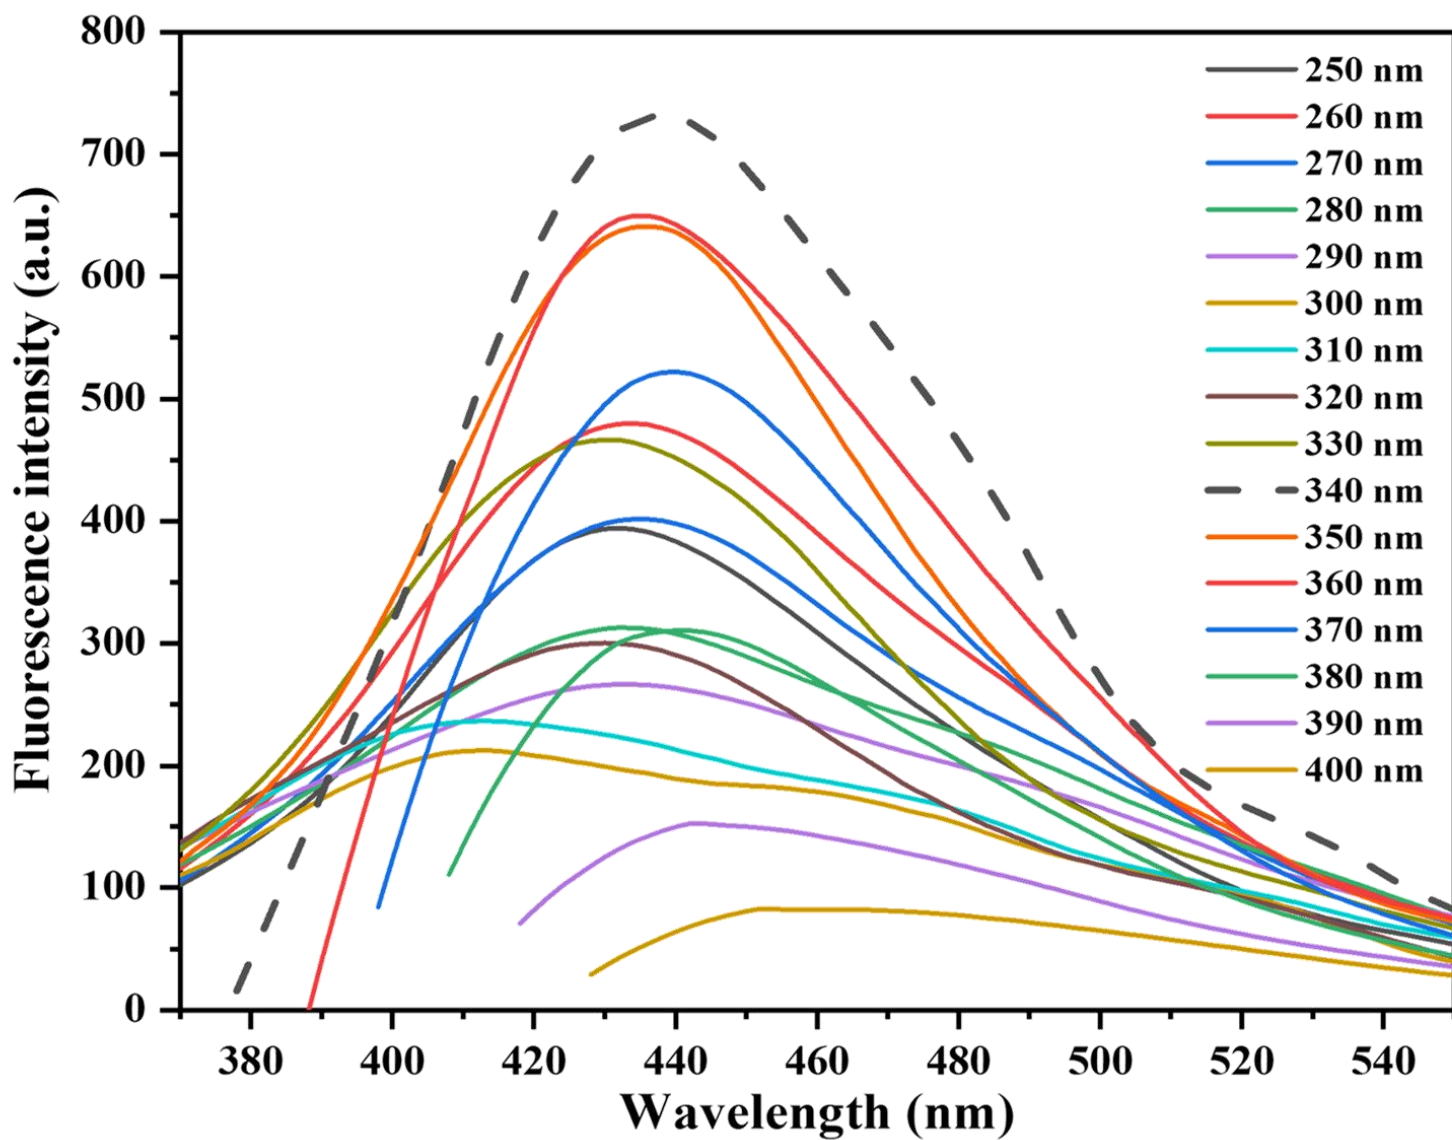

**Figure S3.** Fluorescence emission spectra of BCNNs at various excitation wavelengths ranging from 250 to 400 nm.

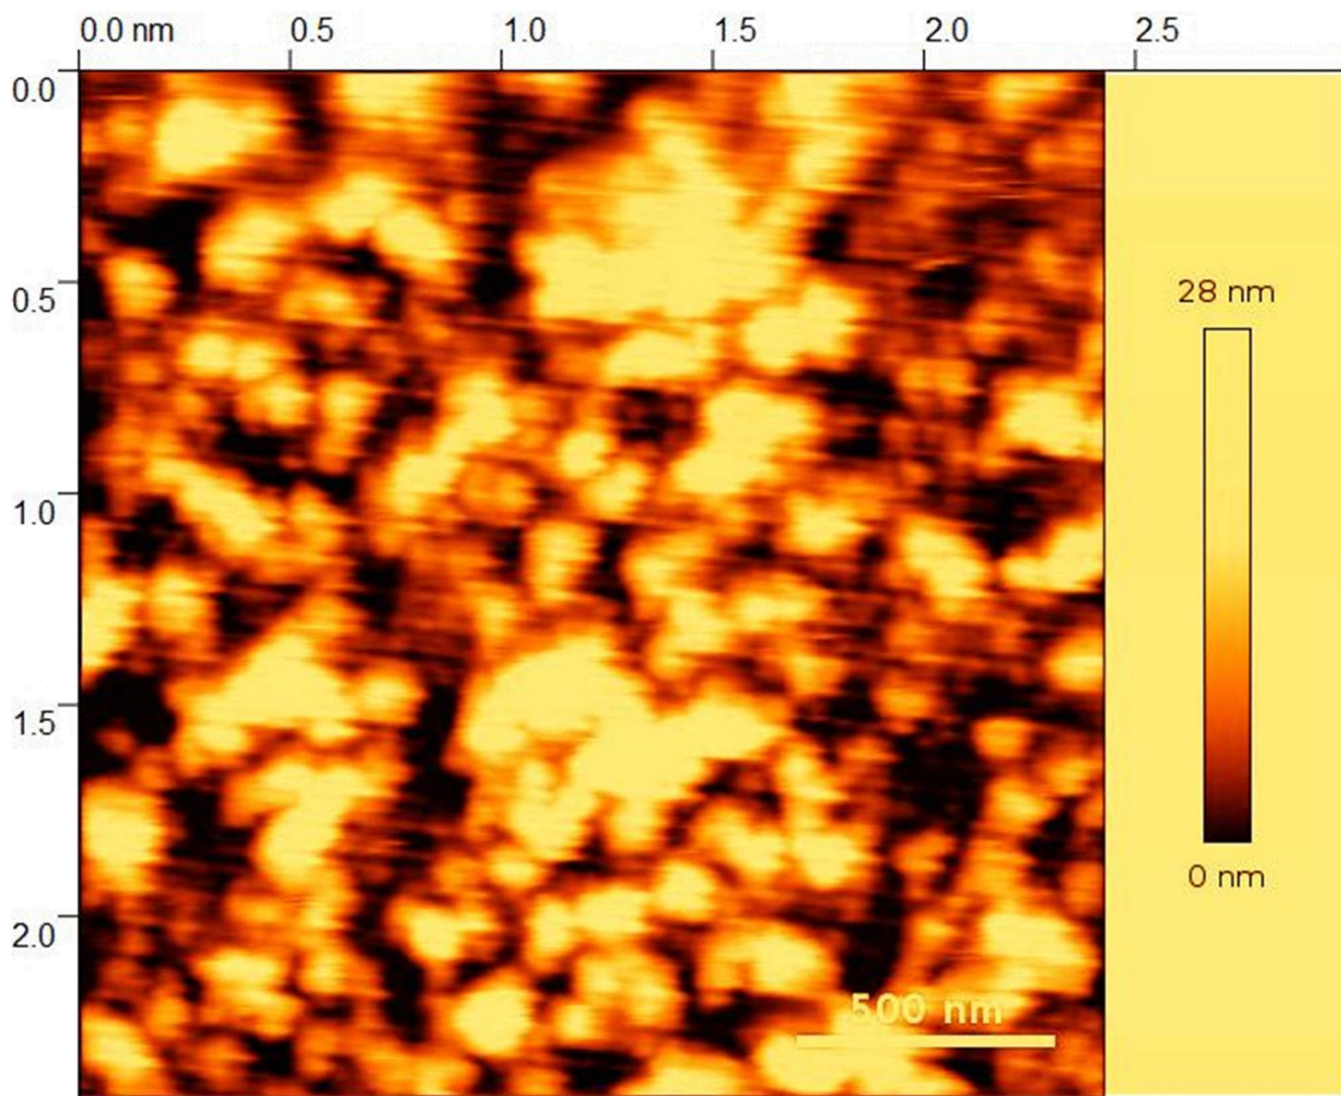

**Figure S4.** AFM image of BCNNSs.

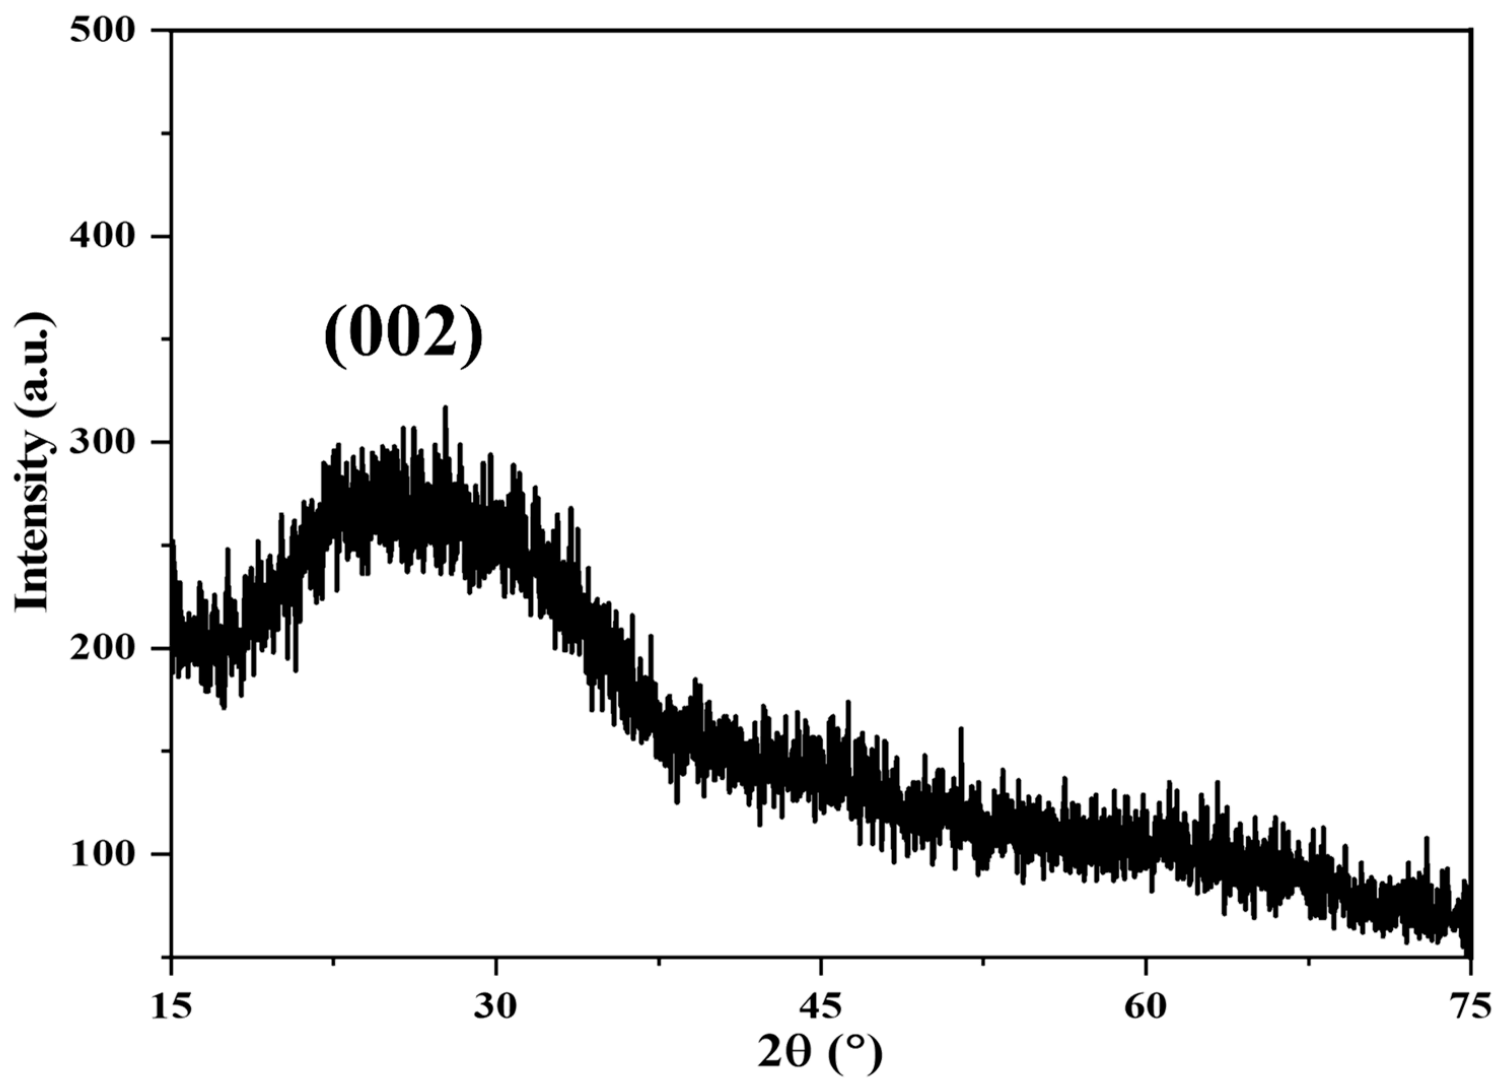

**Figure S5.** The XRD pattern of BCNNSs.

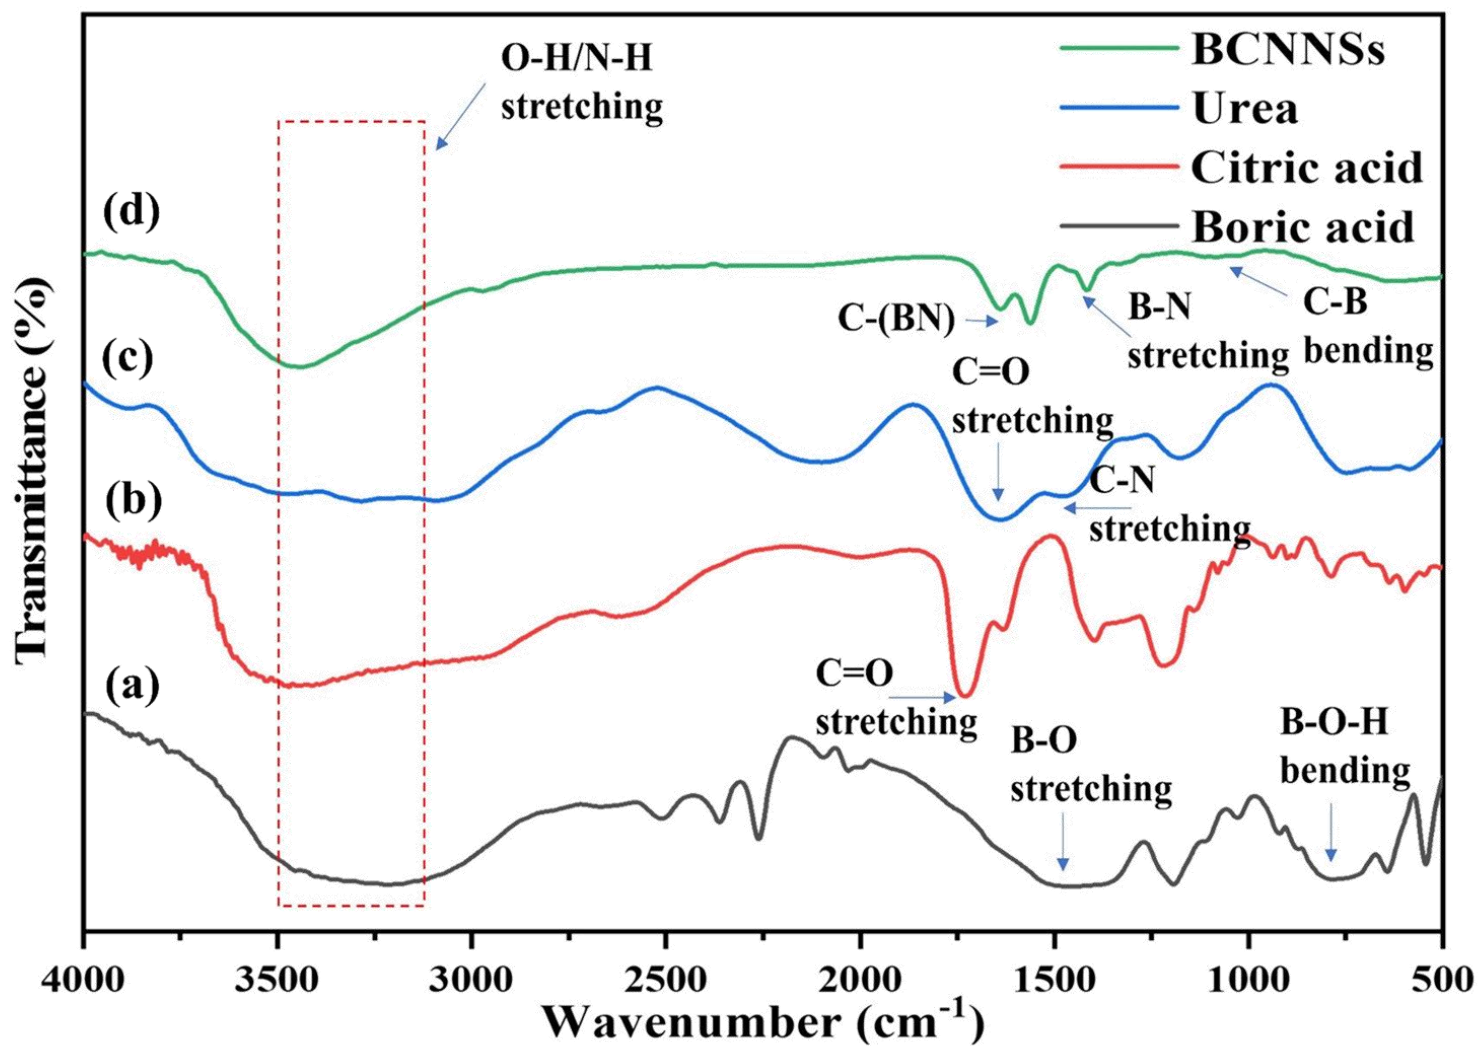

**Figure S6.** FT-IR spectra of (a) boric acid, (b) citric acid, (c) urea and (d) BCNNSs.



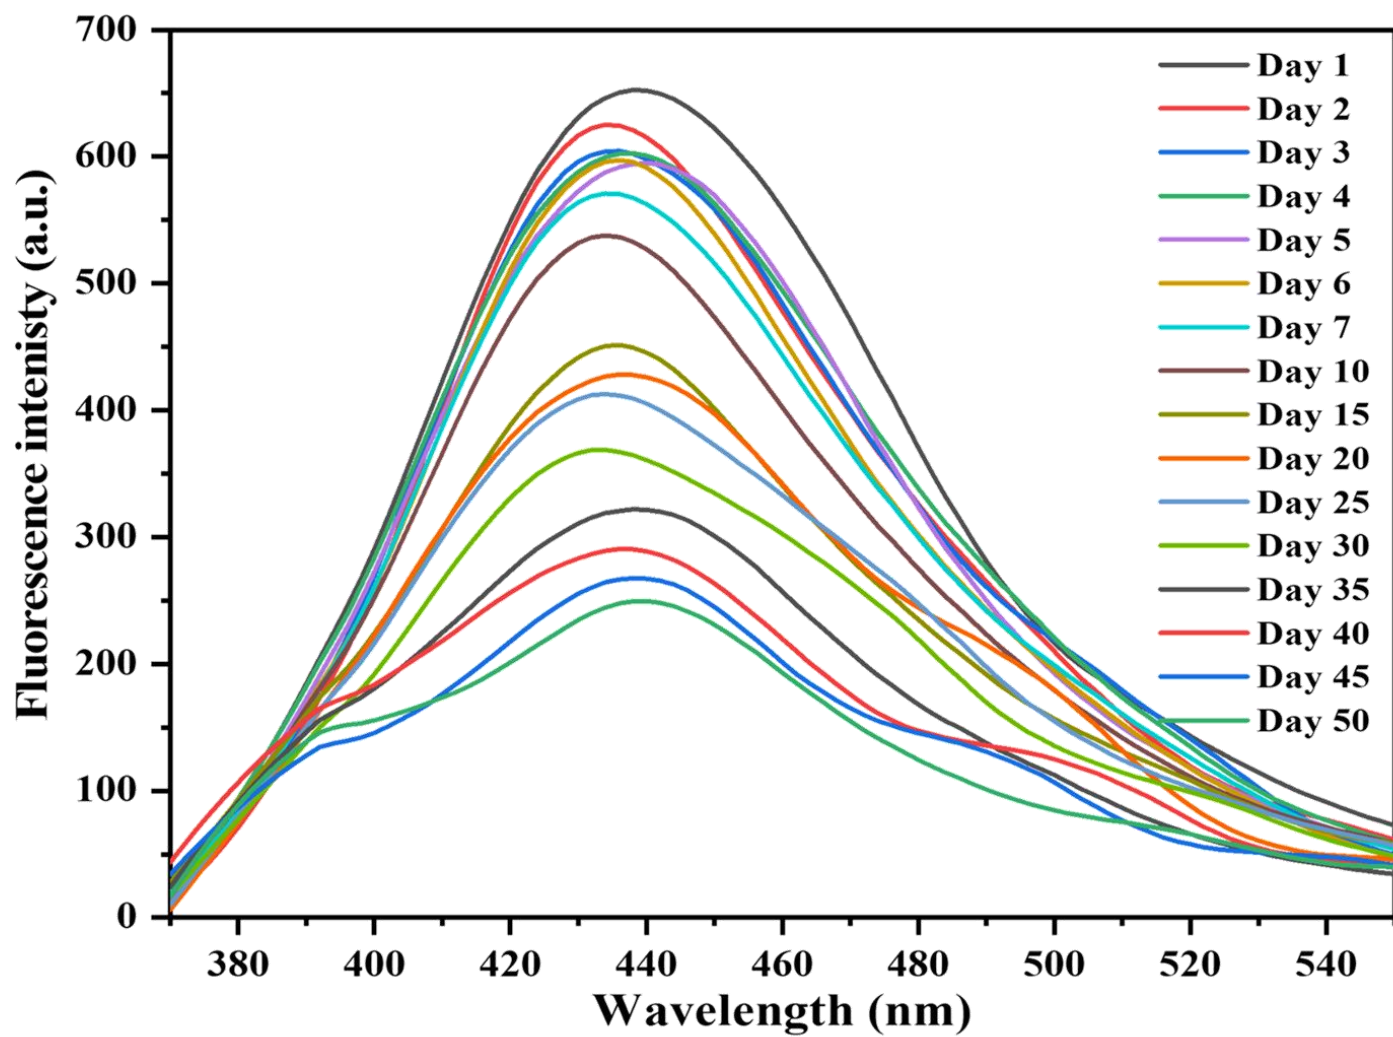

**Figure S7.** The stability study of BCNNs from Day 1–50.

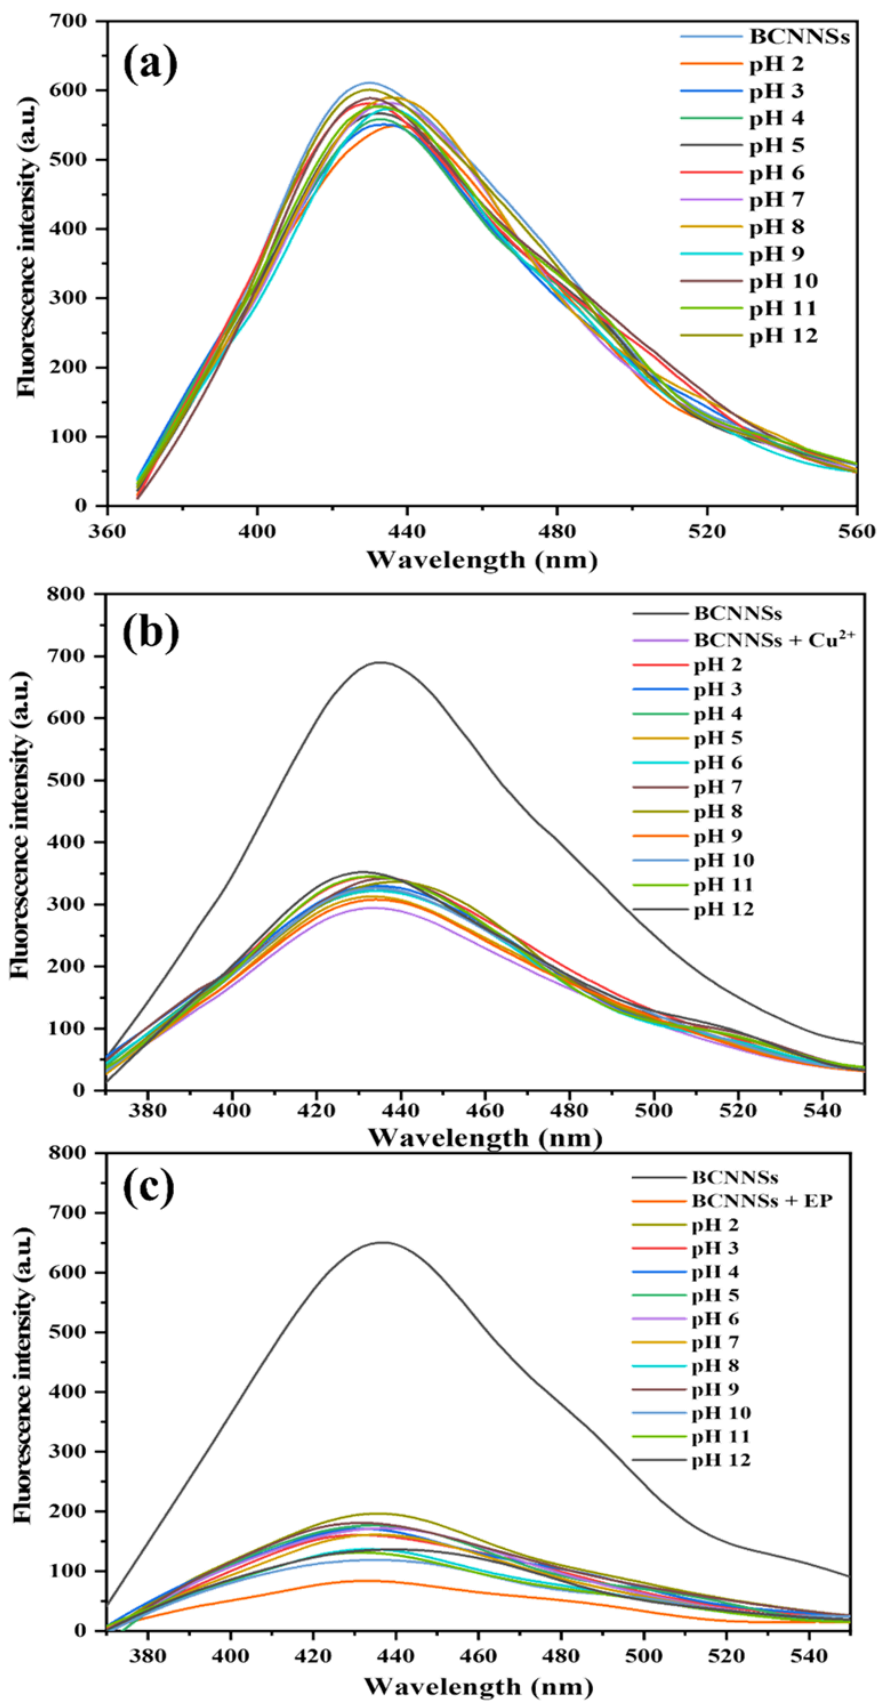

**Figure S8.** Effect of pH on the fluorescence emission intensity of (a) BCNNs, (b) with  $\text{Cu}^{2+}$ , and (c) with EP in the presence of PBS pHs from 2.0 to 12.



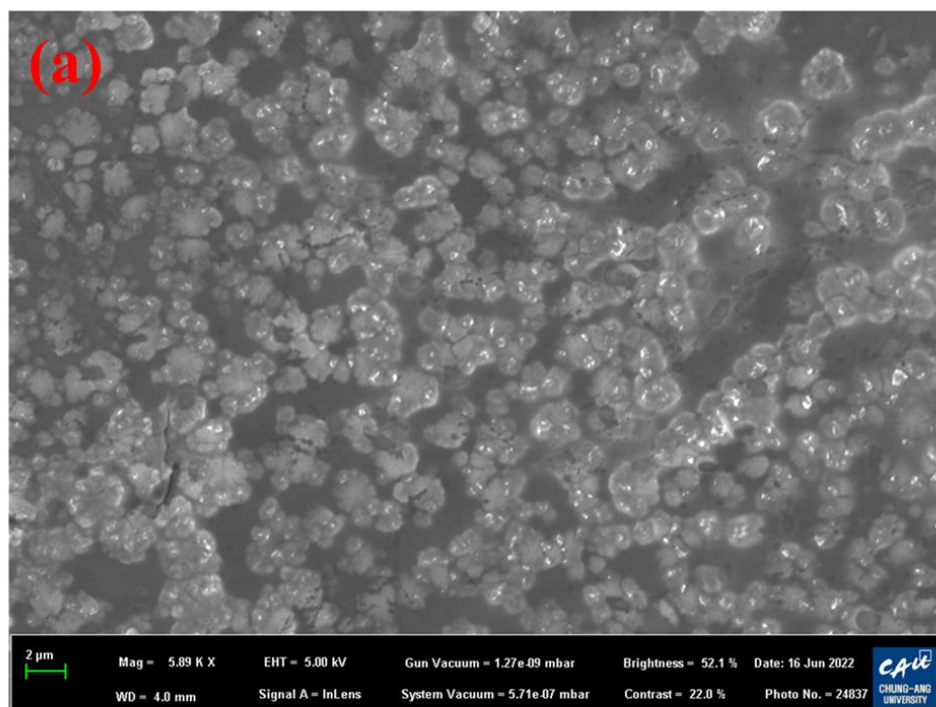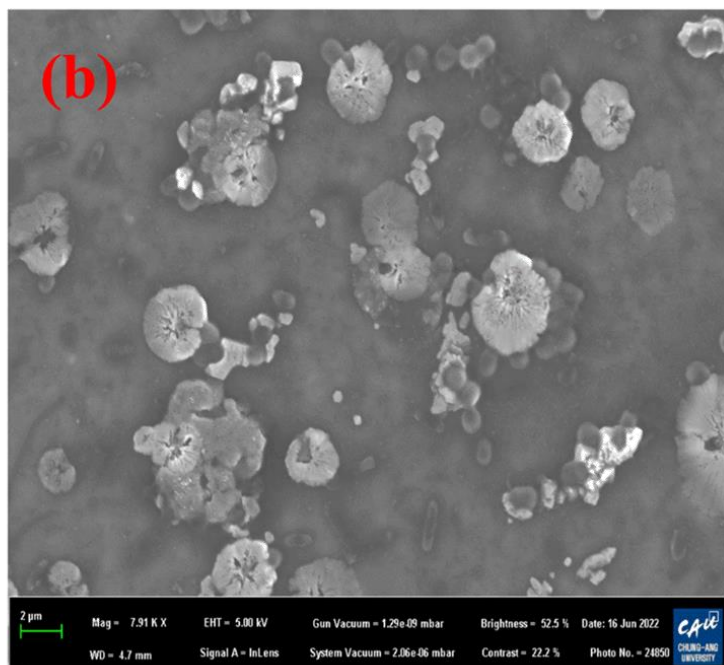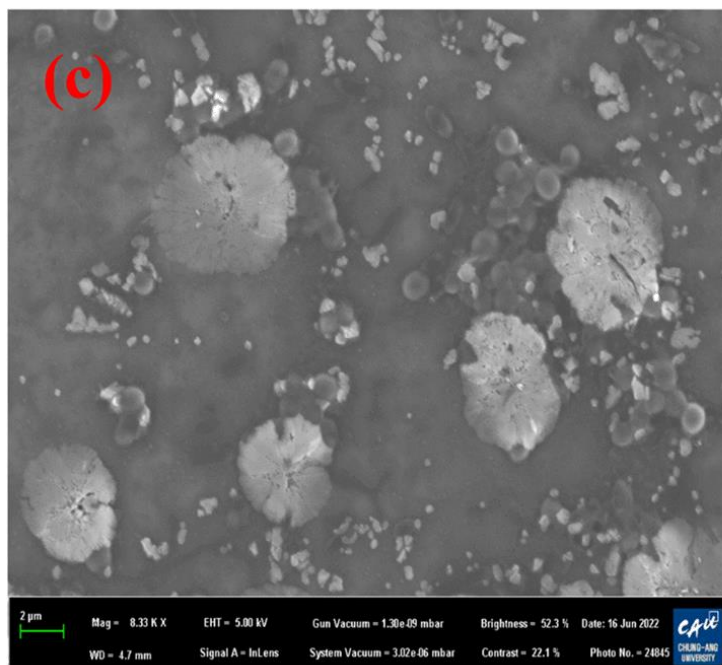

**Figure S9.** FE-SEM images of (a) BCNNs, (b) BCNNs with  $\text{Cu}^{2+}$ , and (c) BCNNs with EP.

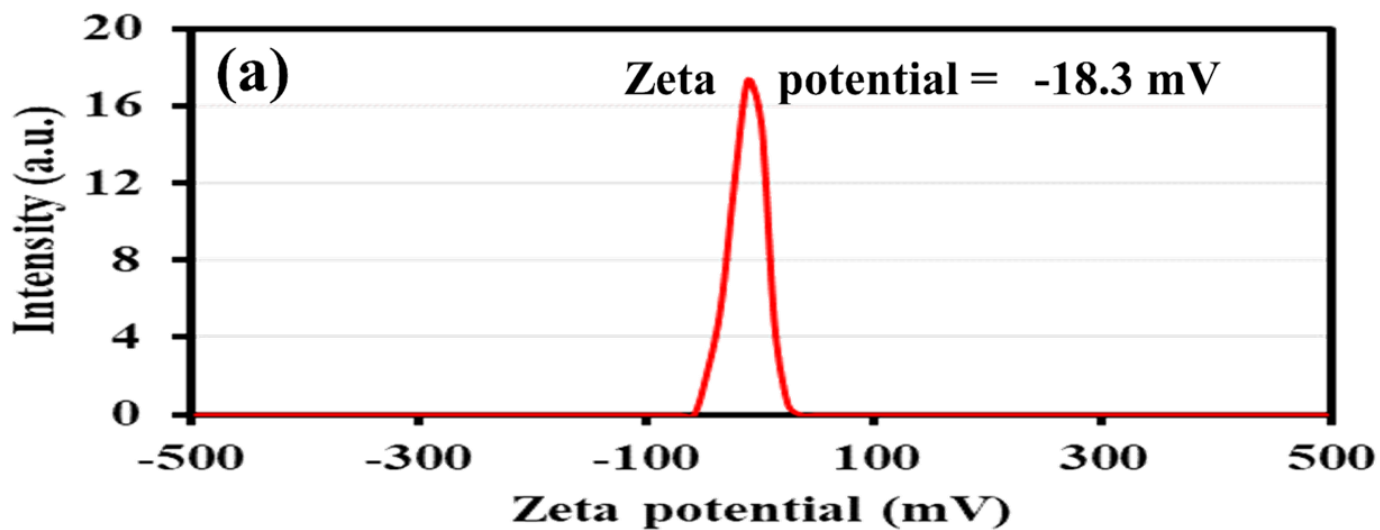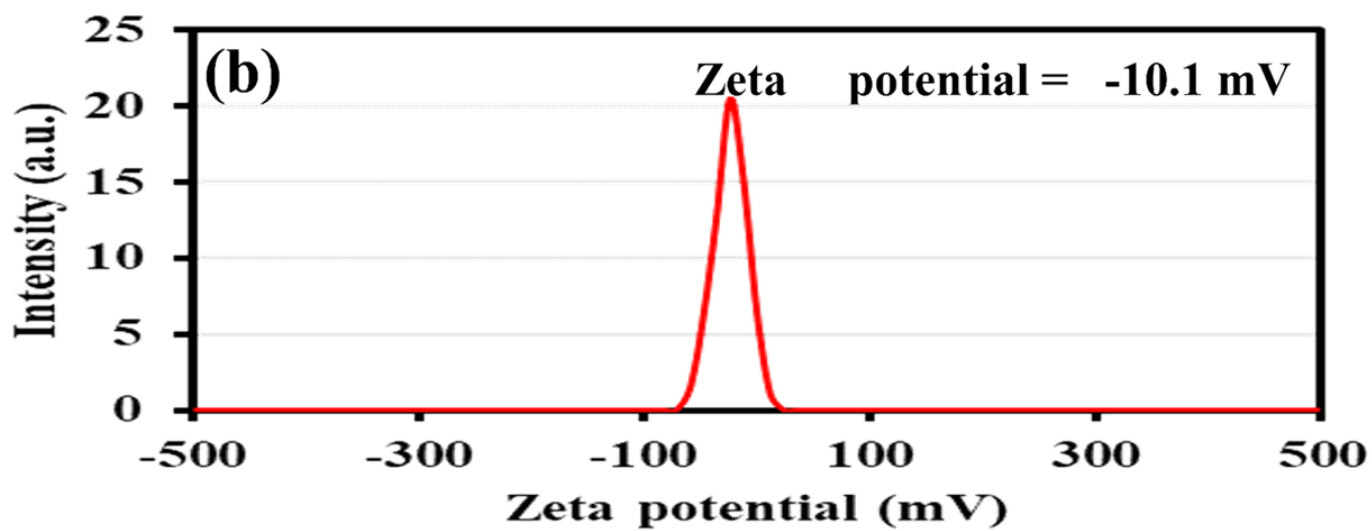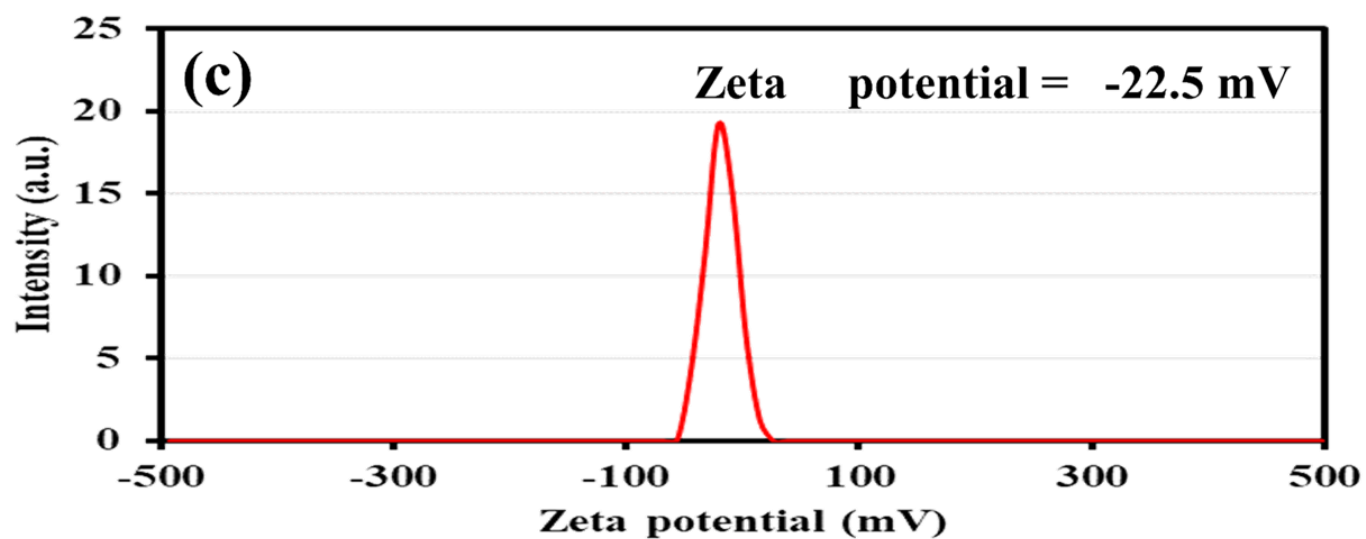

Figure S10. Zeta potentials of (a) BCNNs (b) BCNNs + Cu<sup>2+</sup> and, (c) BCNNs + EP.

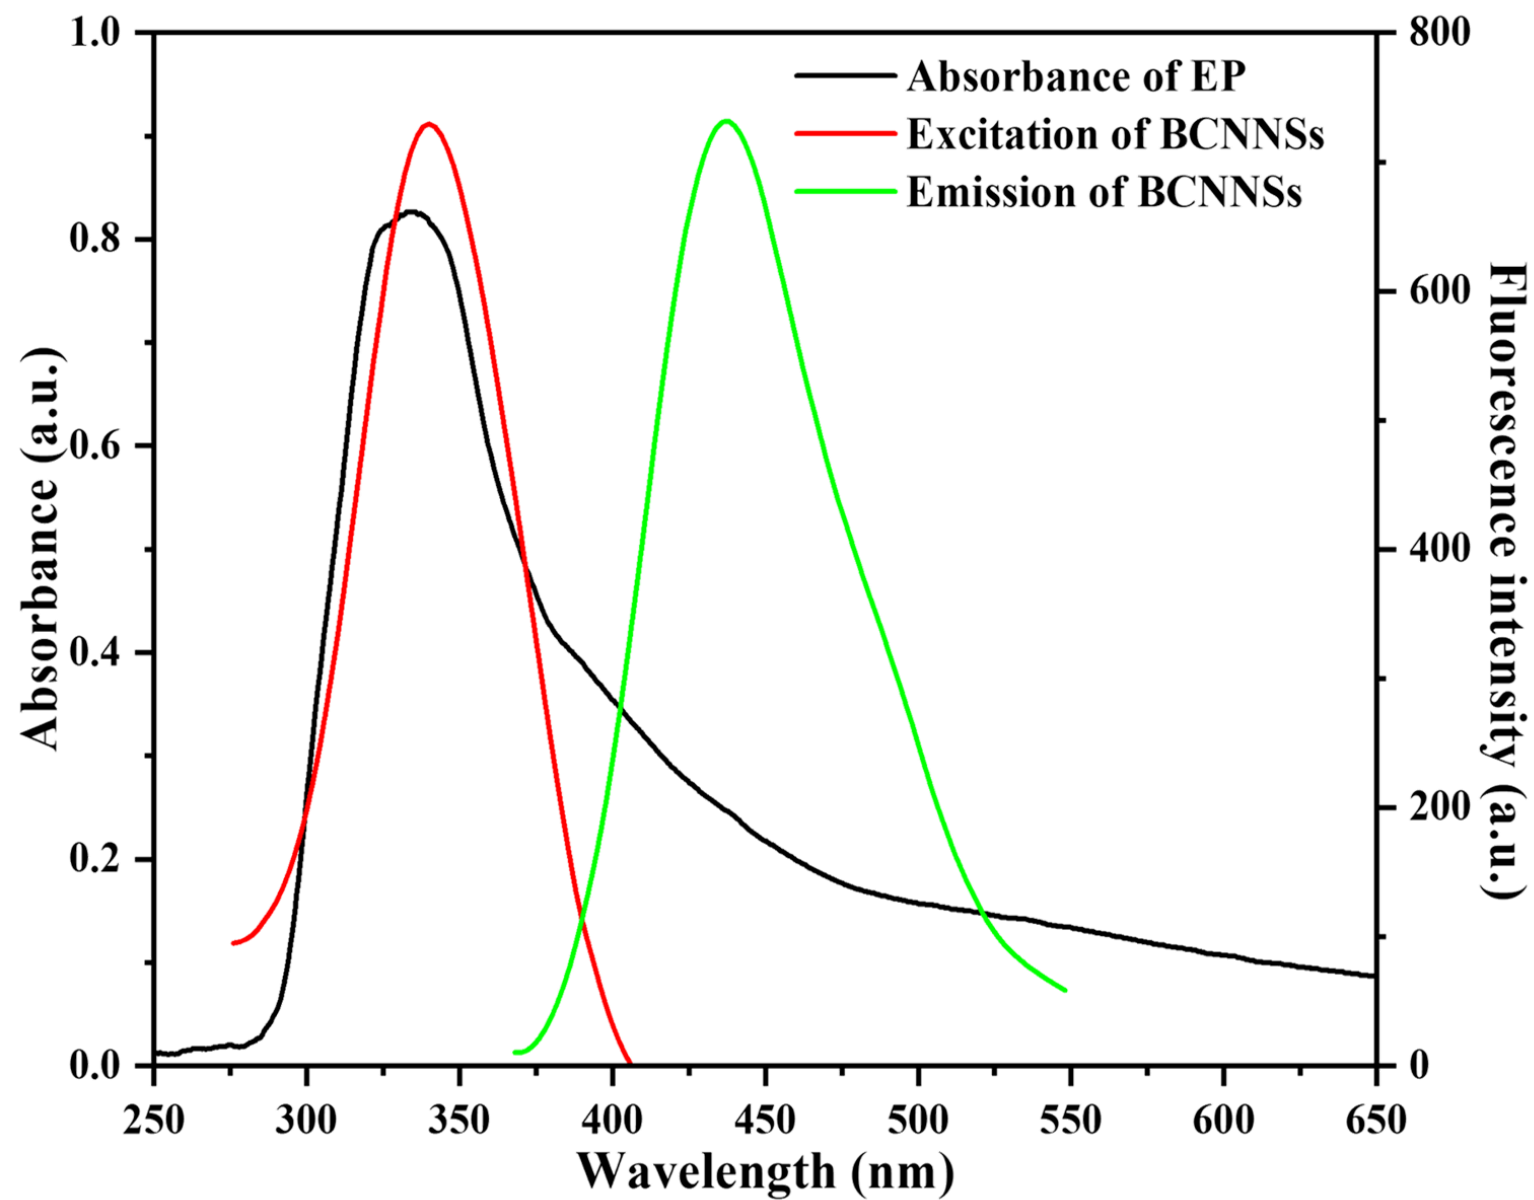

**Figure S11.** Absorbance spectra of EP. Excitation and emission spectra of BCNNSs.

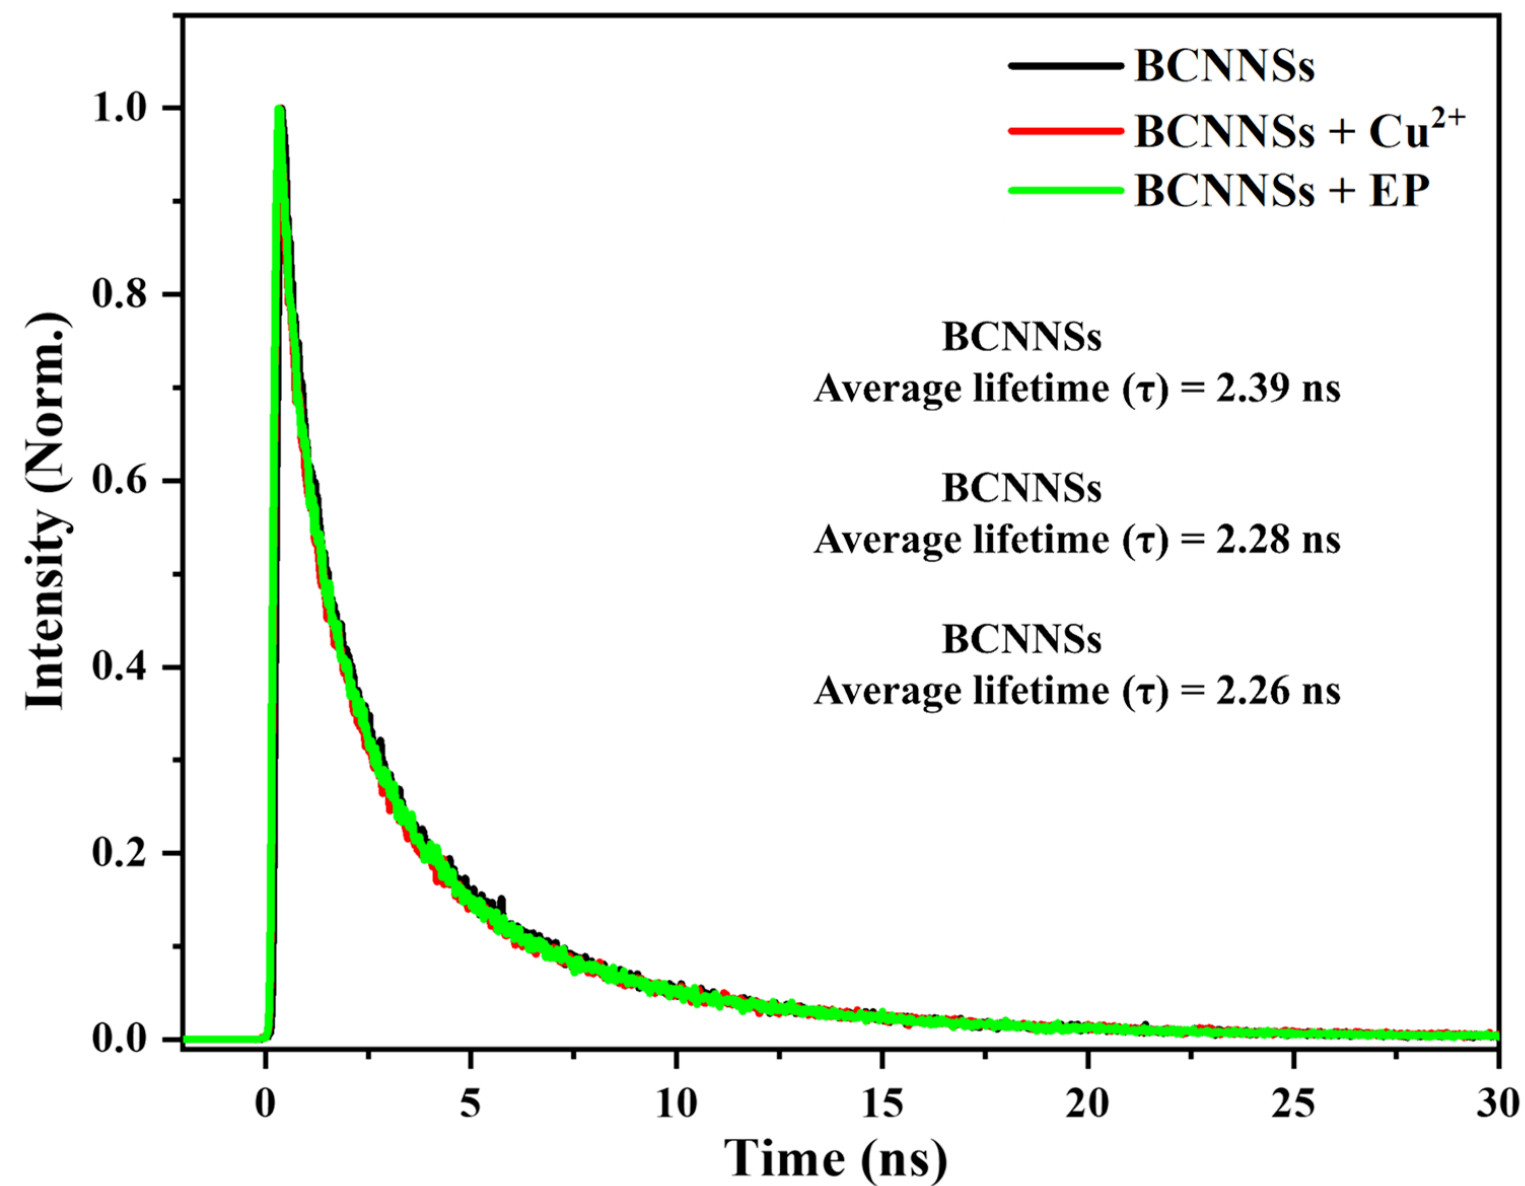

**Figure S12.** Lifetime analysis of BCNNSs, BCNNSs + Cu<sup>2+</sup>, and BCNNSs + EP.

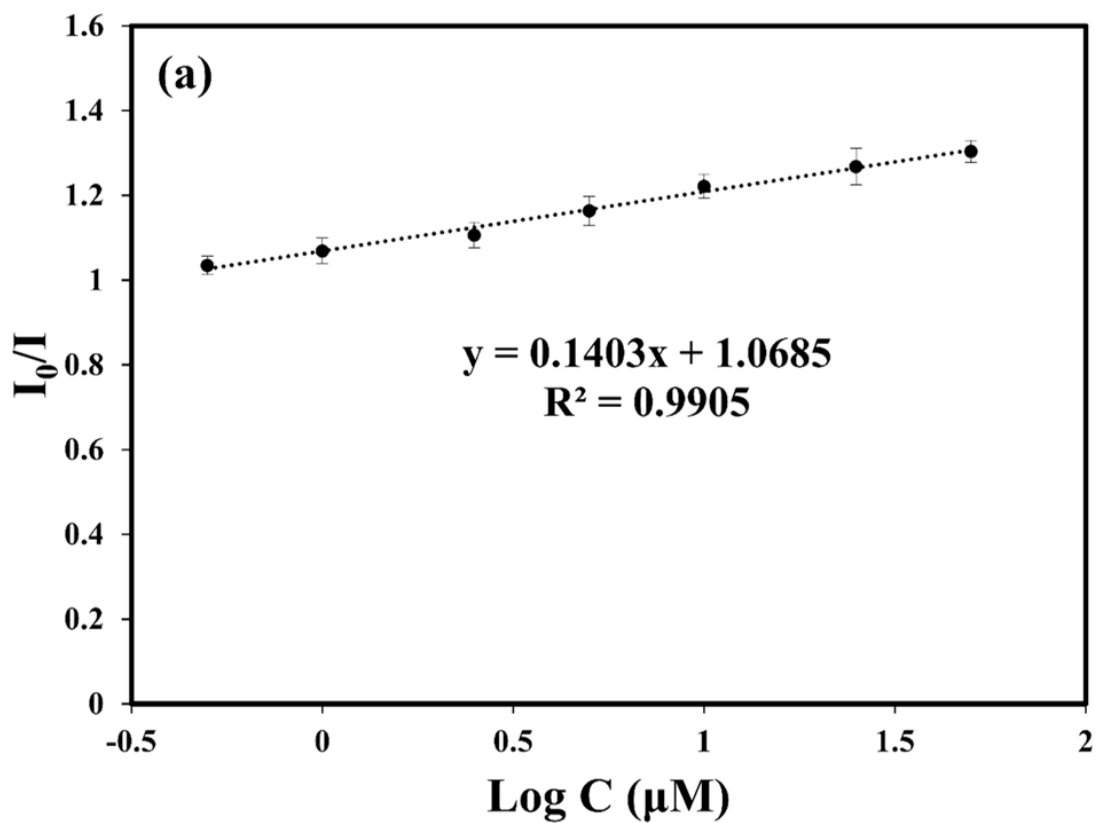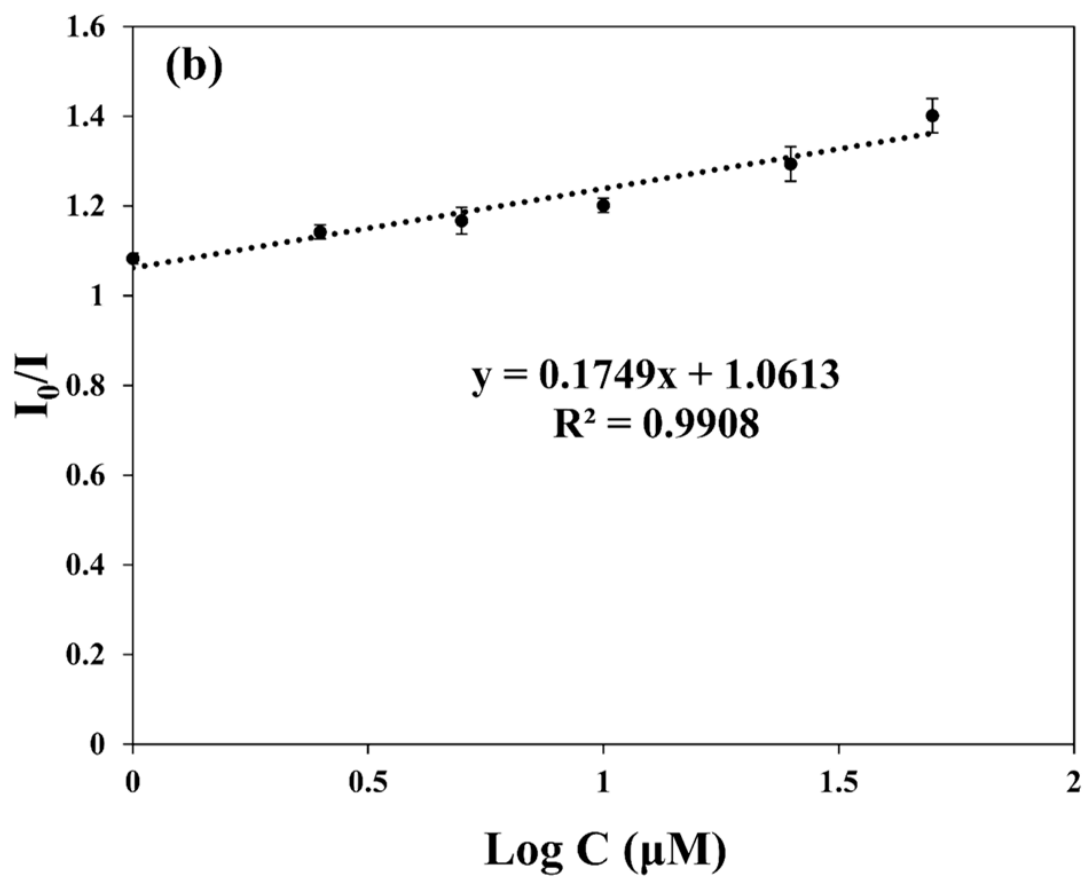

**Figure S13.** Calibration curves constructed between the fluorescence emission ratio ( $I_0/I$ ) of BCNNSs at 436 nm and the concentrations of (a)  $\text{Cu}^{2+}$  (0.5–50  $\mu\text{M}$ ), and (b) EP (1.0–50  $\mu\text{M}$ ).

**Table S1.** Application of BCNNSs as a fluorescence sensing probe for the analysis of Cu<sup>2+</sup> in water samples (tap and industrial) and EP in pharmaceutical sample.

| Sample                | Cu <sup>2+</sup> ions |            |                       |         |
|-----------------------|-----------------------|------------|-----------------------|---------|
|                       | Added (μM)            | Found (μM) | Recovery (%)<br>(n=3) | RSD (%) |
| Tap water             | 0.5                   | 0.49       | 99.05                 | 0.72    |
|                       | 1.0                   | 0.98       | 99.56                 | 0.75    |
|                       | 2.5                   | 2.46       | 98.42                 | 0.74    |
| Industrial water      | 0.5                   | 0.49       | 99.75                 | 0.96    |
|                       | 1.0                   | 0.99       | 99.07                 | 0.57    |
|                       | 2.5                   | 2.46       | 98.60                 | 0.61    |
|                       | <b>EP</b>             |            |                       |         |
| Pharmaceutical sample | -                     | 0.98       | 98.05                 | 0.48    |
|                       | -                     | 2.48       | 99.56                 | 0.71    |
|                       | -                     | 4.98       | 99.69                 | 1.63    |
